# Supplementary material for: Tuning the morphology and optoelectronic properties of AgBiI4 film through isopropanol treatment
Source: Royal Society of Chemistry journal article supplement (doi:10.1039/d1tc05445g), 2022-01-01
Supplement: d1tc05445g1.pdf [file d1tc05445g1.pdf]

## Supplementary Information

### **Tuning the morphology and optoelectronic properties of AgBiI<sub>4</sub> film through isopropanol treatment**

Wenjing Zhai<sup>a</sup>, Lin Huang<sup>a</sup>, Xiaomin Cui<sup>a</sup>, Guangyuan Li<sup>a</sup>, Zhihang Zhang<sup>a</sup>, Peizhuo Chen<sup>a</sup>, Yongqiang Li<sup>a</sup>, Yuxia Tang<sup>a</sup>, Lin Lin<sup>b</sup>, Zhibo Yan<sup>\* a)</sup>, and Jun-Ming Liu<sup>ac</sup>

<sup>a</sup> *Laboratory of Solid-State Microstructures and Innovation Center of Advanced Microstructures, Nanjing University, Nanjing 210093, China.*

<sup>b</sup> *Department of Applied Physics, College of Science, Nanjing Forestry University, Nanjing 210037, China*

<sup>c</sup> *Institute for Advanced Materials, Hubei Normal University, Huangshi 435001, China*

\* Author to whom correspondence should be addressed: zbyan@nju.edu.cn

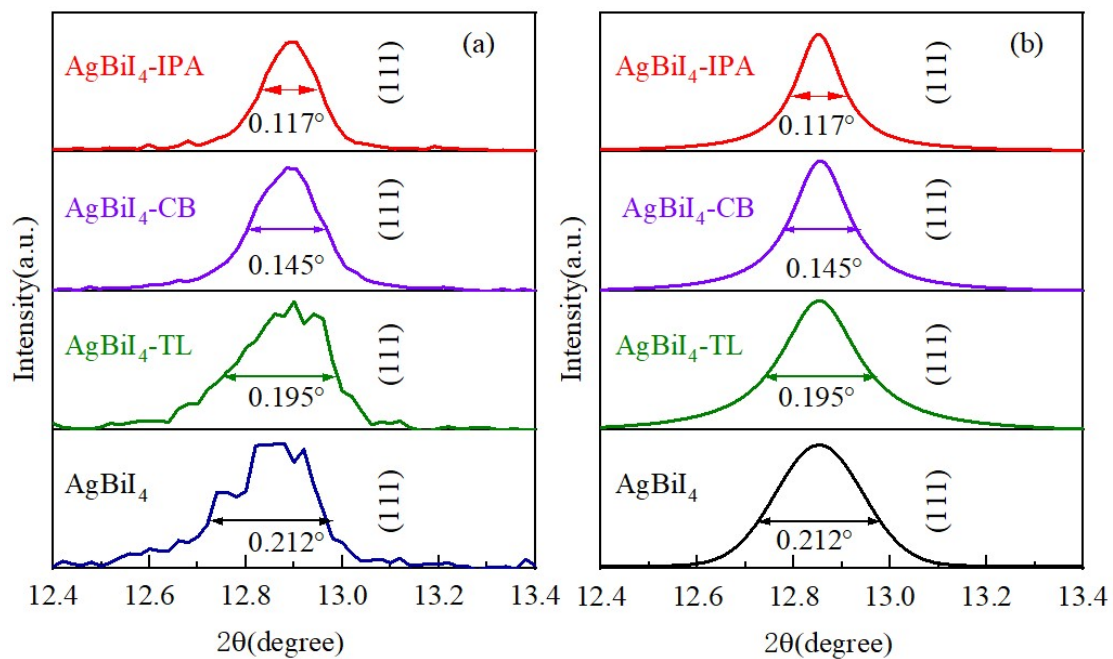

Figure S1 FWHM of the (111) peak of different  $\text{AgBiI}_4$  films. (a) original, and (b) fitted curve.

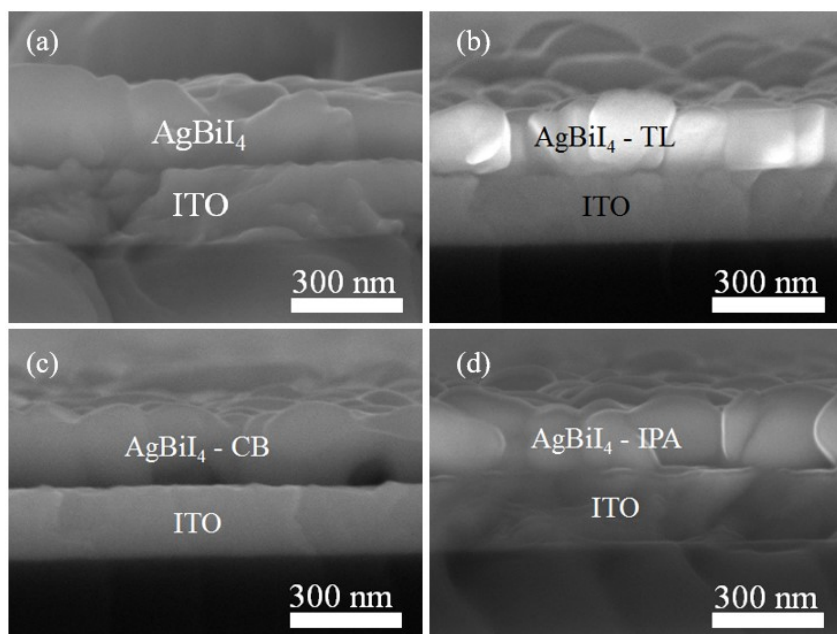

Figure S2 Cross section SEM images of the  $\text{AgBiI}_4$  films fabricated (a) without the antisolvent treatment and (b-d) with the antisolvent treatments of toluene, chlorobenzene, and isopropanol respectively.

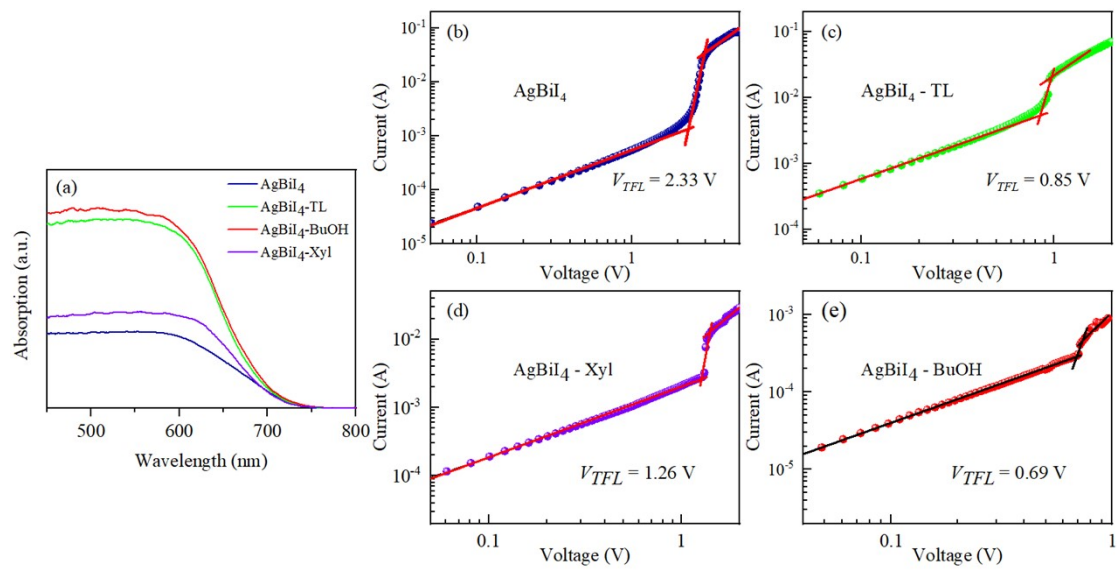

Figure S3 (a) Optical absorption spectra of AgBiI<sub>4</sub> films without and with the different antisolvent treatments. (b)-(e) The dark J-V curves of the ITO/AgBiI<sub>4</sub>/Au devices, with the AgBiI<sub>4</sub> films fabricated without antisolvent treatment, and with toluene, m-xylene, and n-butyl alcohol treatment respectively.

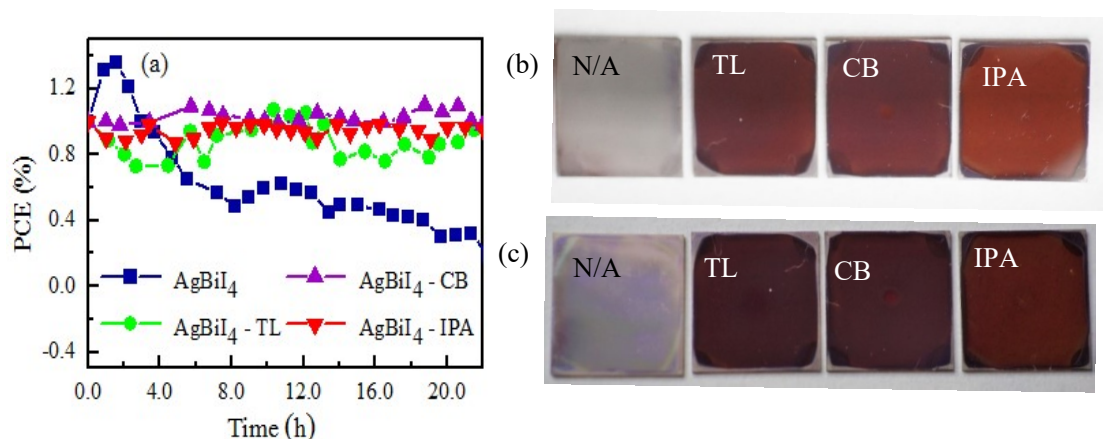

Figure S4 (a) PCE stability of AgBiI<sub>4</sub> devices measured under continuous illumination by white light-emitting-diode (LED) in air environment. (b) The pictures of AgBiI<sub>4</sub> films without and with antisolvents treatments. (c) The pictures of AgBiI<sub>4</sub> films they are placed in the air a week later, with 25°C, 40±10% R.H.

### The stability of AgBiI<sub>4</sub> film and device:

For evaluating the stability of the AgBiI<sub>4</sub> solar cells, we remeasure them and find that the PCE of them does not obviously decay after keeping in vacuum for more than three months. In order to further confirm the stability of devices, we test the PCE of the different solar cells under continuous white-LED illumination with 100 mWcm<sup>-2</sup> in the air (25°C, 40±10% R.H.). As shown in Figure S4(a), the PCE of the device without antisolvent treatment seriously decays after 22 h, while that of the antisolvent-treated devices does not obviously decay. This indicates that the IPA-treated solar cell is more stable than the non-treated one. Besides, Figure S4(b) shows the pictures of the freshly prepared AgBiI<sub>4</sub> films and Figure S4(c) is the pictures of them after they are placed in the air a week later. It can be seen that the color of all antisolvent-treated films does not obviously change, suggesting that all the antisolvent-treated films have good stability.
